# Supplementary material
Source: Springer Nature journal article supplement (https://www.springermedizin.de/resource/supplementary/12873_2008_72_MOESM2_ESM.pdf/9431958)

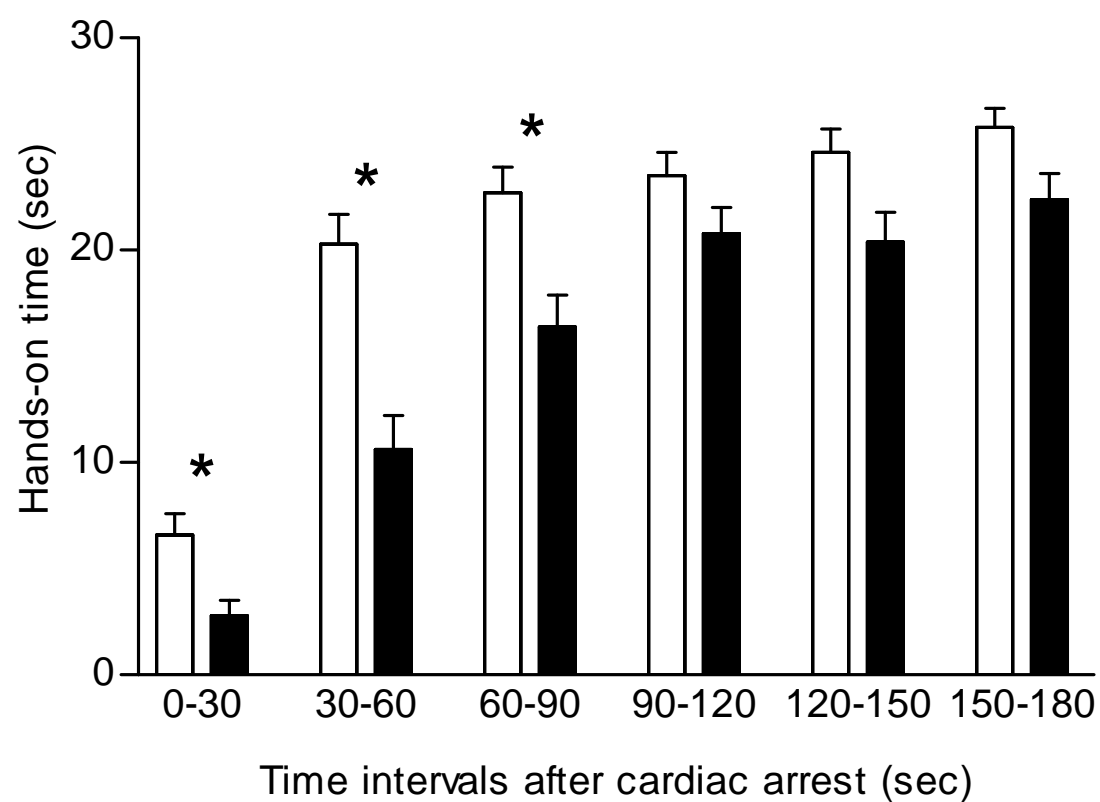

Supplement: MOESM2 [file 9431958]
